# Supplementary material for: MorphoSeq: Full Single-Cell Transcriptome Dynamics Up to Gastrulation in a Chordate
Source: PubMed Central journal article supplement (PMC7237864; doi:10.1016/j.cell.2020.03.055), 2020-05-14
Supplement: mmc1.pdf [file mmc1.pdf]

**Cell, Volume 181**

## **Supplemental Information**

### **MorphoSeq: Full Single-Cell Transcriptome**

### **Dynamics Up to Gastrulation in a Chordate**

**Hanna L. Sladitschek, Ulla-Maj Fiuza, Dinko Pavlinic, Vladimir Benes, Lars Hufnagel, and Pierre A. Neveu**

| Embryo label | Embryo stage | Collected cell # |
|--------------|--------------|------------------|
| 02cell08111  | 2-cell       | 2/2              |
| 02cell08112  | 2-cell       | 2/2              |
| 02cell08113  | 2-cell       | 2/2              |
| 02cell08114  | 2-cell       | 2/2              |
| 02cell08115  | 2-cell       | 2/2              |
| 02cell08116  | 2-cell       | 2/2              |
| 02cell08117  | 2-cell       | 2/2              |
| 02cell08118  | 2-cell       | 2/2              |
| 04cell08111  | 4-cell       | 4/4              |
| 04cell08112  | 4-cell       | 4/4              |
| 04cell08113  | 4-cell       | 4/4              |
| 04cell08114  | 4-cell       | 4/4              |
| 04cell08115  | 4-cell       | 4/4              |
| 04cell08116  | 4-cell       | 4/4              |
| 04cell08117  | 4-cell       | 4/4              |
| 04cell08118  | 4-cell       | 4/4              |
| 08cell08111  | 8-cell       | 8/8              |
| 08cell08112  | 8-cell       | 8/8              |
| 08cell08113  | 8-cell       | 8/8              |
| 08cell08114  | 8-cell       | 8/8              |
| 08cell08115  | 8-cell       | 8/8              |
| 08cell08116  | 8-cell       | 8/8              |
| 08cell08117  | 8-cell       | 8/8              |
| 08cell08118  | 8-cell       | 8/8              |
| 16cell06081  | 16-cell      | 16/16            |
| 16cell06082  | 16-cell      | 16/16            |
| 16cell06201  | 16-cell      | 16/16            |
| 16cell09091  | 16-cell      | 16/16            |
| 16cell09092  | 16-cell      | 16/16            |
| 16cell09093  | 16-cell      | 16/16            |
| 16cell09094  | 16-cell      | 16/16            |
| 16cell09095  | 16-cell      | 16/16            |
| 16cell09096  | 16-cell      | 16/16            |
| 16cell09097  | 16-cell      | 16/16            |
| 16cell09098  | 16-cell      | 16/16            |
| 32cell06091  | 32-cell      | 28/32            |
| 32cell06092  | 32-cell      | 23/32            |
| 32cell06093  | 32-cell      | 30/32            |
| 32cell06191  | 32-cell      | 28/32            |
| 32cell06193  | 32-cell      | 26/32            |
| 32cell06211  | 32-cell      | 23/32            |
| 32cell06212  | 32-cell      | 26/32            |
| 32cell06213  | 32-cell      | 31/32            |
| 32cell09040  | 32-cell      | 28/32            |
| 32cell09041  | 32-cell      | 25/32            |
| 32cell09043  | 32-cell      | 26/32            |
| 32cell09044  | 32-cell      | 31/32            |
| 32cell09045  | 32-cell      | 27/32            |
| 32cell09046  | 32-cell      | 28/32            |
| 64cell06081  | 64-cell      | 32/64            |
| 64cell06201  | 64-cell      | 47/64            |
| 64cell06202  | 64-cell      | 31/64            |
| 64cell08071  | 64-cell      | 46/64            |
| 64cell08072  | 64-cell      | 53/64            |
| 64cell09081  | 64-cell      | 59/64            |
| 64cell09082  | 64-cell      | 57/64            |
| 64cell09083  | 64-cell      | 60/64            |

**Supplementary Table S1. Summary of single-cell collection for scRNA-Seq. Related to Figure 1.**

| Cell type | Total cell # | Corresponding cells                      |
|-----------|--------------|------------------------------------------|
| AB2       | 16           | AB2                                      |
| A3        | 16           | A3                                       |
| B3        | 15           | B3                                       |
| A4.1&a4.2 | 32           | A4.1, a4.2                               |
| B4.1      | 15           | B4.1                                     |
| b4.2      | 16           | b4.2                                     |
| A5.1-2    | 43           | A5.1, A5.2                               |
| B5.1      | 20           | B5.1                                     |
| B5.2      | 20           | B5.2                                     |
| a5.3-4    | 43           | a5.3, a5.4                               |
| b5.3-4    | 42           | b5.3, b5.4                               |
| A6.1&3    | 47           | A6.1, A6.3                               |
| A6.2&4    | 48           | A6.2, A6.4                               |
| B6.1      | 24           | B6.1                                     |
| B6.2      | 18           | B6.2                                     |
| B6.3      | 21           | B6.3                                     |
| B6.4      | 21           | B6.4                                     |
| a6.5-8    | 95           | a6.5, a6.6, a6.7, a6.8                   |
| b6.5-8    | 95           | b6.5, b6.6, b6.7, b6.8                   |
| A7.1-2    | 27           | A7.1, A7.2                               |
| A7.3&7    | 25           | A7.3, A7.7                               |
| A7.4      | 12           | A7.4                                     |
| A7.5      | 10           | A7.5                                     |
| A7.6      | 13           | A7.6                                     |
| A7.8      | 11           | A7.8                                     |
| B7.1-2    | 26           | B7.1, B7.2                               |
| B7.3      | 12           | B7.3                                     |
| B7.4      | 13           | B7.4                                     |
| B7.5      | 10           | B7.5                                     |
| B7.6      | 7            | B7.6                                     |
| B7.7      | 8            | B7.7                                     |
| B7.8      | 10           | B7.8                                     |
| a7.9-10   | 16           | a7.9, a7.10                              |
| a7.11-16  | 79           | a7.11, a7.12, a7.13, a7.14, a7.15, a7.16 |
| b7.9      | 10           | b7.9                                     |
| b7.10     | 11           | b7.10                                    |
| b7.11-16  | 66           | b7.11, b7.12, b7.13, b7.14, b7.15, b7.16 |

**Supplementary Table S2. Cell types identified by scRNA-Seq and corresponding *P. mammillata* cells. Related to Figure 4.**

| Primer name        | Sequence                                     |
|--------------------|----------------------------------------------|
| AP-2-like2 Forward | AATACGCGTTTCCCAGTTTTGCGCTGCTTCATCA           |
| AP-2-like2 Reverse | CTAGTCGACTGACAGAACTCCAACCTCCCGCTAC           |
| Fkh Forward        | AATGCTAGCATGATGTTGTCGTCTCCCCATCAAAG          |
| Fkh Reverse        | CTAGGTACCTTAGTTGGCCGGTACGCACCCTTG            |
| FoxD-a/b Forward   | AATACGCGTGAATGACAGTTCAGACCTACGGACAC          |
| FoxD-a/b Reverse   | CTAGTCGACTTACGTTGTGCGTCCAAAACAAGGCC          |
| Macho1 Forward     | AATACGCGTCCTACCCCGGCTGTGGAAGGTATT            |
| Macho1 Reverse     | CTAGTCGACAGGGGTGTGGGTGATTGAAGTTGGT           |
| MyoD Forward       | TCATGACCGTCGCCGCGCGGCCA                      |
| MyoD Reverse       | CTAATACGACTCACTATAGGGCATAGTTCGTCGGTGATGC     |
| Nodal Forward      | CTATGGATATGACACAAGTATCGTTCTGC                |
| Nodal Reverse      | GATCCTAATACGACTCACTATAGGGTTATCGACATCCACATTCT |
| Tbx6b Forward      | AATACGCGTTCGCAGTTTGAACCATCTTCTGCCG           |
| Tbx6b Reverse      | CTAGTCGACTGTATCGCTTTGTGAAGGCTGGTGC           |
| Wnt3 Forward       | AATGCTAGCATGAATTTAGTTGGTTCTGTGGCGGTCTG       |
| Wnt3 Reverse       | CTAGGTACCCGTCACTTGCACGTGTGTTCCCTCG           |
| ZicL Forward       | CTAGTCGACCGAGTTTCTTTTCCGGCAGCTCACA           |
| ZicL Reverse       | AATACGCGTACGTGACCACCGTTTTGGTTAGGTG           |

**Supplementary Table S3. Primer sequences. Related to STAR Methods.**
